# Supplementary material for: Graphene Oxide/Polyvinyl Alcohol–Formaldehyde Composite Loaded by Pb Ions: Structure and Electrochemical Performance
Source: MDPI journal article supplement (doi:10.3390/polym14112303), 2022-06-06
Supplement: s1 [file s1]

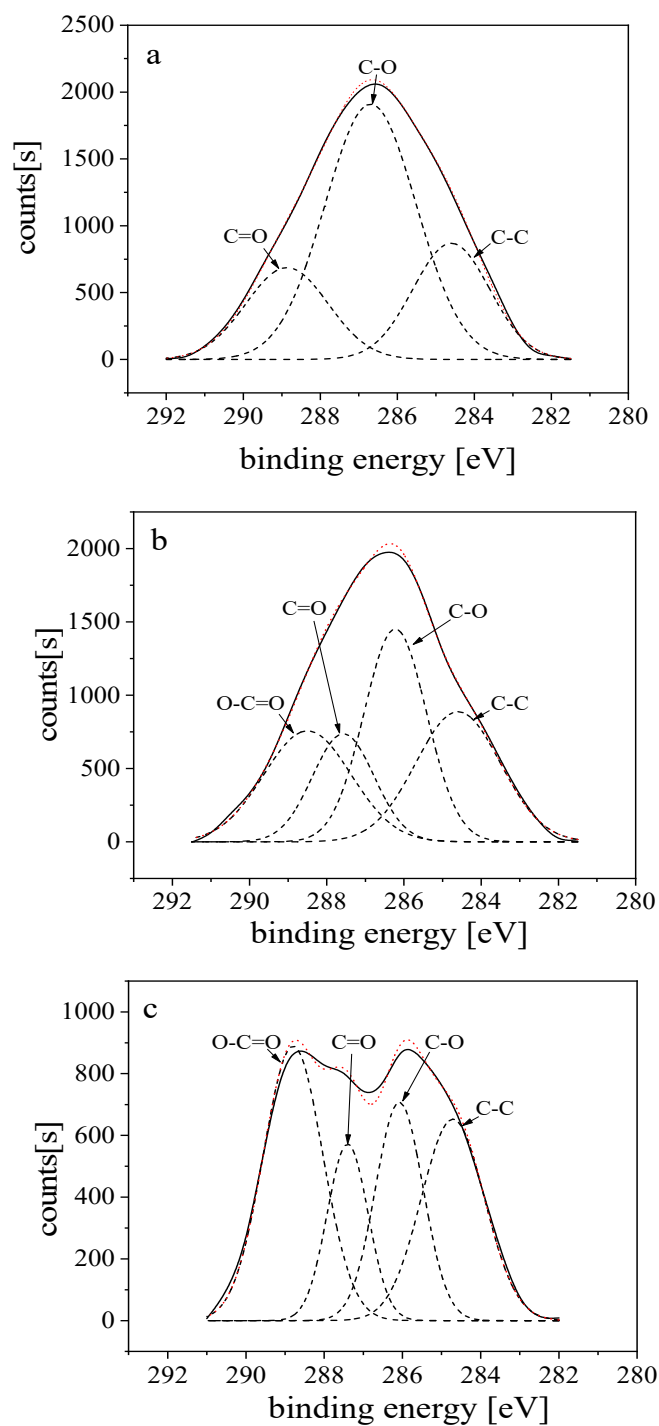

**Figure S1.** High-resolution XPS spectra of the C1s peak of (a) the blank PVF polymer, (b) the PVF/GO and (c) the PVF/GO/Pb composite. The solid line represents the experimental data where the dashed lines represent the individual contributions. The dotted red line is a fit of a sum of three or four Gaussians to the data.

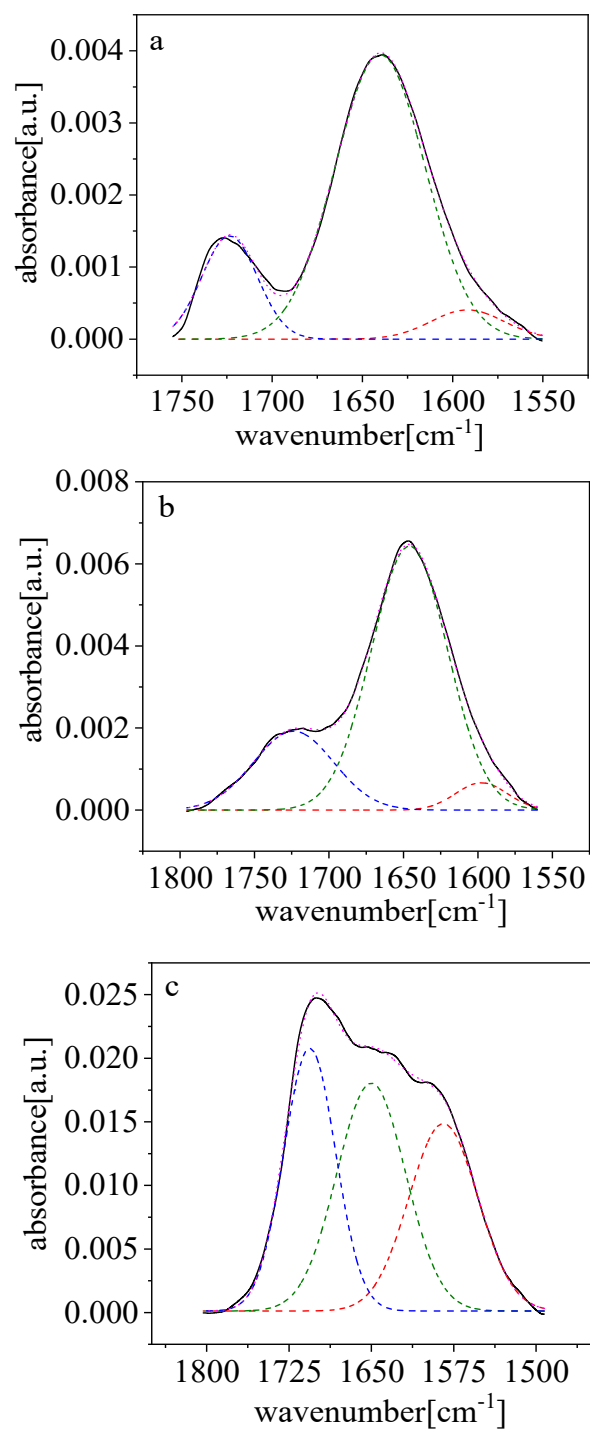

**Figure S2.** FTIR spectra of stretching band from 1500 to 1800  $\text{cm}^{-1}$  for the different materials de-convoluted into three peaks (a) PVF, (b) PVF/GO and (c) PVF/GO/Pb composite.

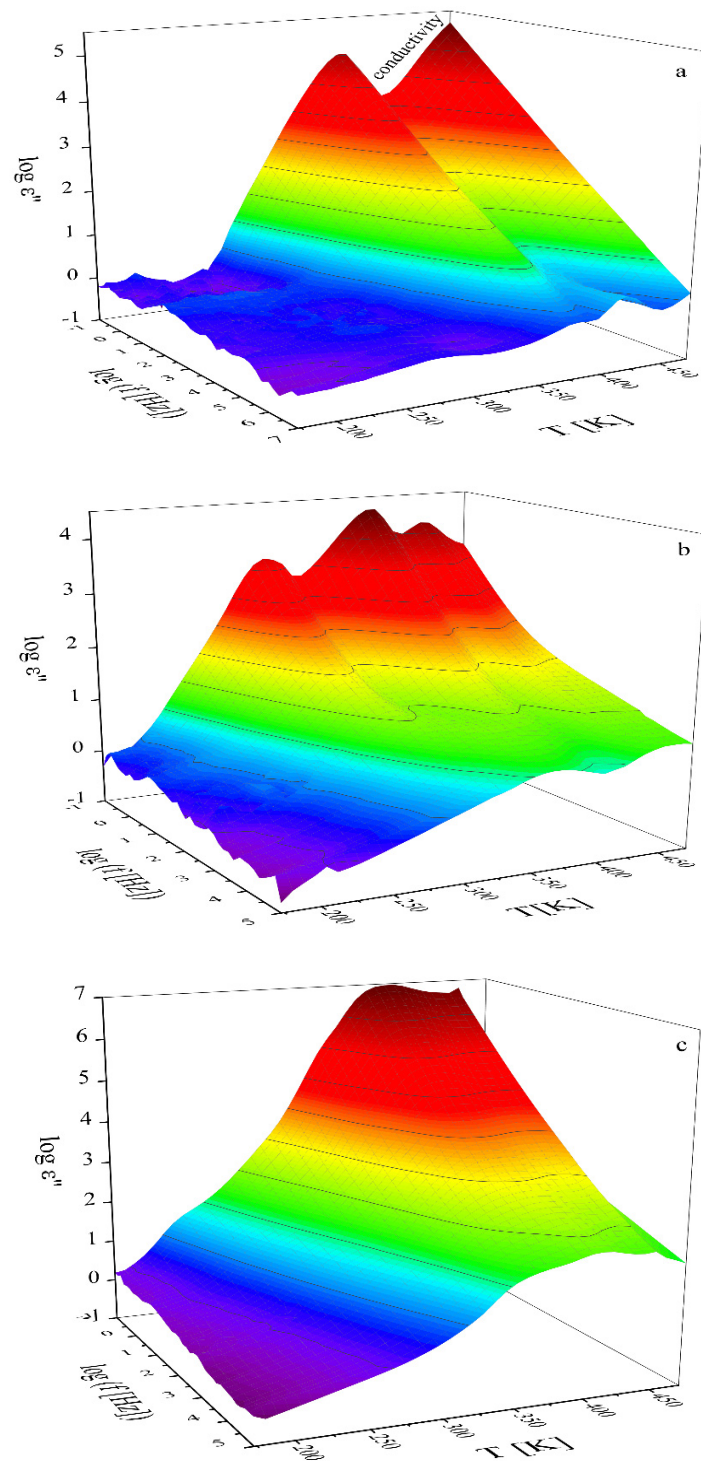

**Figure S3.** 3D representation of the dielectric loss ( $\log \varepsilon''$ ) as function of frequency and temperature for the heating cycle of (a) PVF, and (b) PVF/GO and (c) PVF/GO/Pb composites.

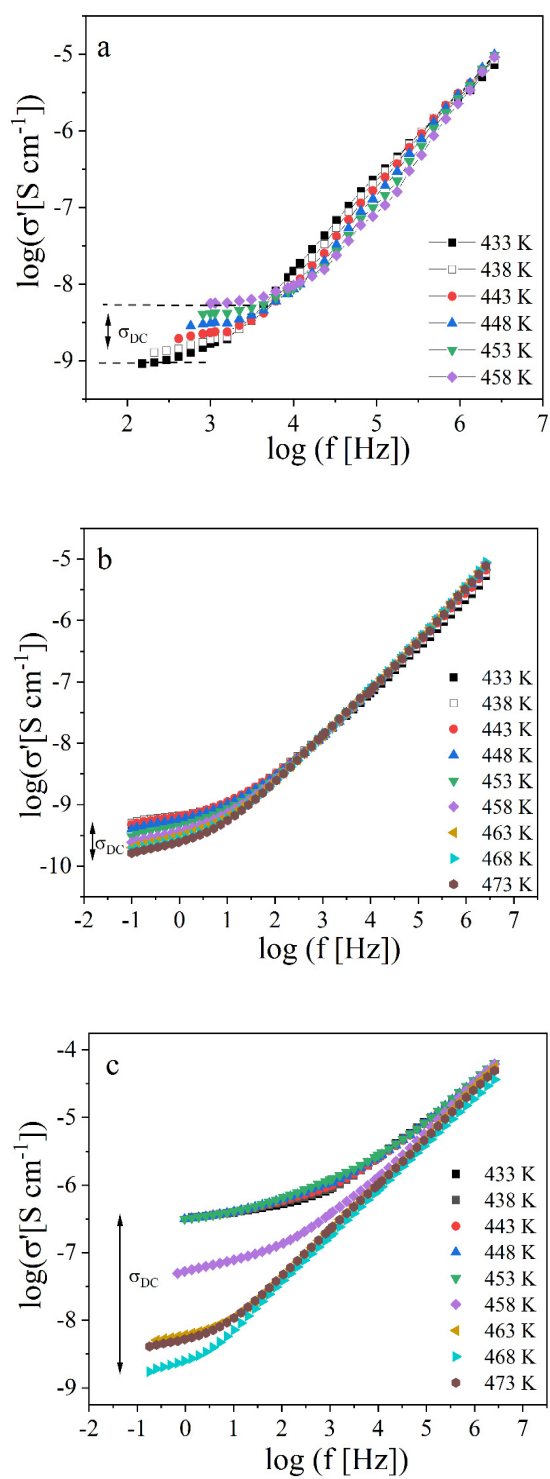

**Figure S4.** Real part of the complex conductivity  $\sigma'$  vs. frequency  $f$  at the indicated temperatures on the heating run; (a) PVF, (b) PVF/GO and (c) PVF/GO/Pb.
